# Supplementary material
Source: MDPI journal article supplement (https://www.mdpi.com/2073-4441/16/9/1201)
Supplement: s1 [file s1]

**Table S2.** Binary logistic regression showing the relationship between independent variables and livelihood opportunities

| <b>Zonal analysis (all 15 communities combined)</b> |            |             |             |               |                |              |
|-----------------------------------------------------|------------|-------------|-------------|---------------|----------------|--------------|
| <b>Variables</b>                                    | <b>S.E</b> | <b>Wald</b> | <b>Sig.</b> | <b>Exp(B)</b> | <b>95% C.I</b> |              |
|                                                     |            |             |             |               | <b>Lower</b>   | <b>Upper</b> |
| Marital status                                      | 1.292      | 3.733       | 0.053       | 12.141        | 0.965          | 152.798      |
| All year fishing                                    | 0.127      | 60.822      | <0.001**    | 0.372         | 0.290          | 0.477        |
| House ownership                                     | 0.132      | 65.575      | <0.001**    | 0.343         | 0.265          | 0.445        |
| Canoe ownership                                     | 0.145      | 274.633     | <0.001**    | 0.090         | 0.068          | 0.119        |
| Age (Ref: <30)                                      | -          | 57.453      | <0.001**    | -             | -              | -            |
| 30–40                                               | 1.050      | 6.880       | 0.009**     | 0.064         | 0.008          | 0.498        |
| 41–50                                               | 1.049      | 4.014       | 0.045**     | 0.122         | 0.016          | 0.955        |
| > 50                                                | 1.064      | 10.599      | 0.001**     | 0.031         | 0.004          | 0.252        |
| Household size (Ref: 3)                             | -          | 45.657      | <0.001**    | -             | -              | -            |
| 4                                                   | 0.798      | 0.001       | 0.974       | 0.974         | 0.204          | 4.654        |
| >5                                                  | 0.797      | 3.575       | 0.059       | 0.222         | 0.046          | 1.057        |
| Constant                                            | 0.348      | 230.107     | <0.001**    | 196.013       | -              | -            |
| N                                                   | 5250       |             |             |               |                |              |
| Nagelkerke ( <i>pseudo R</i> <sup>2</sup> )         | 0.408      |             |             |               |                |              |
| <b>Analysis for individual communities</b>          |            |             |             |               |                |              |
| <b>Elmina</b>                                       |            |             |             |               |                |              |
| Marital status                                      | 8395.561   | 0.000       | 0.998       | 47837739.93   | 0.000          | -            |
| All year fishing                                    | 0.978      | 0.001       | 0.976       | 0.971         | 0.143          | 6.609        |
| House ownership                                     | 0.995      | 2.589       | 0.108       | 0.202         | 0.029          | 1.418        |
| Canoe ownership                                     | 3576.301   | 0.000       | 0.992       | 0.000         | 0.000          | -            |
| Age (Ref: <30)                                      | -          | 0.000       | 1.000       | -             | -              | -            |
| 30–40                                               | 23337.312  | 0.000       | 1.000       | 0.099         | 0.000          | -            |
| 41–50                                               | 23714.979  | 0.000       | 0.999       | 15726989.57   | 0.000          | -            |
| > 50                                                | 24575.5576 | 0.000       | 1.000       | 4.320         | 0.000          | -            |
| Household size (Ref: 3)                             | -          | 0.000       | 1.000       | -             | -              | -            |
| 4                                                   | 23479.417  | 0.000       | 0.999       | 0.000         | 0.000          | -            |
| >5                                                  | 23714.979  | 0.000       | 0.999       | 0.000         | 0.000          | -            |
| Constant                                            | 7595.757   | 0.000       | 0.998       | 0.000         | -              | -            |
| N                                                   | 350        |             |             |               |                |              |
| Nagelkerke ( <i>pseudo R</i> <sup>2</sup> )         | 0.926      |             |             |               |                |              |
| <b>Cape Coast</b>                                   |            |             |             |               |                |              |
| Marital status                                      | 32816.659  | 0.000       | 1.000       | 1.000         | 0.000          | -            |
| All year fishing                                    | 0.504      | 13.074      | <0.001**    | 6.191         | 2.304          | 16.630       |
| House ownership                                     | 0.384      | 4.081       | 0.043**     | 0.460         | 0.217          | 0.977        |
| Canoe ownership                                     | 0.373      | 9.660       | 0.002**     | 0.314         | 0.151          | 0.652        |
| Age (Ref: <30)                                      | -          | 0.274       | 0.965       | -             | -              | -            |
| 30–40                                               | 28419.839  | 0.000       | 0.999       | 0.000         | 0.000          | -            |
| 41–50                                               | 28419839   | 0.000       | 0.999       | 0.000         | 0.000          | -            |
| > 50                                                | 28419839   | 0.000       | 0.999       | 0.000         | 0.000          | -            |
| Household size (Ref: 3)                             | -          | 5.152       | 0.023**     | -             | -              | -            |
| 4                                                   | 0.616      | 5.152       | 0.023**     | 4.045         | 1.210          | 13.518       |
| Constant                                            | 16408.712  | 0.000       | 0.999       | 01615475383   | -              | -            |
| N                                                   | 350        |             |             |               |                |              |
| Nagelkerke ( <i>pseudo R</i> <sup>2</sup> )         | 0.260      |             |             |               |                |              |
| <b>Moree</b>                                        |            |             |             |               |                |              |
| Marital status                                      | 16807.886  | 0.000       | 1.000       | 1.398         | 0.000          | -            |
| All year fishing                                    | 3174.920   | 0.000       | 0.995       | 0.000         | 0.000          | -            |
| House ownership                                     | 4853.431   | 0.000       | 1.000       | 0.508         | 0.000          | -            |
| Canoe ownership                                     | 4959.887   | 0.000       | 0.994       | 0.000         | 0.000          | -            |
| Age (Ref: <30)                                      | -          | 7.858       | 0.049**     | -             | -              | -            |
| 30–40                                               | 19371.518  | 0.000       | 0.999       | 148614676.2   | 0.000          | -            |
| 41–50                                               | 19371.517  | 0.000       | 0.999       | 6755212.553   | 0.000          | -            |
| > 50                                                | 20375.374  | 0.000       | 0.999       | 51317729.65   | 0.000          | -            |
| Household size (Ref: 3)                             | -          | 0.000       | 1.000       | -             | -              | -            |
| 4                                                   | 24031.544  | 0.000       | 0.999       | 0.000         | 0.000          | -            |

|                                             |           |           |          |             |             |       |
|---------------------------------------------|-----------|-----------|----------|-------------|-------------|-------|
| >5                                          | 24174.254 | 0.000     | 1.000    | 0.147       | 0.000       | -     |
| Constant                                    | 9191.898  | 0.000     | 0.997    | 2.400E+16   | -           | -     |
| N                                           | 350       |           |          |             |             |       |
| Nagelkerke ( <i>pseudo R</i> <sup>2</sup> ) | 0.844     |           |          |             |             |       |
| <b>Biriwa</b>                               |           |           |          |             |             |       |
| Marital status                              | 15852404  | 0.000     | 1.000    | 1.000       | 0.000       | -     |
| All year fishing                            | 5725.877  | 0.000     | 0.997    | 65889112.10 | 0.000       | -     |
| House ownership                             | 0.671     | 1.866     | 0.172    | 0.400       | 0.107       | 1.490 |
| Canoe ownership                             | 7351.940  | 0.000     | 0.996    | 0.000       | 0.000       | -     |
| Age (Ref: <30)                              | -         | 0.000     | 1.000    | -           | -           | -     |
| 30–40                                       | 16189.163 | 0.000     | 0.999    | 0.000       | 0.000       | -     |
| 41–50                                       | 14890.037 | 0.000     | 1.000    | 2.487       | 0.000       | -     |
| > 50                                        | 17807.785 | 0.000     | 0.999    | 0.000       | 0.000       | -     |
| Household size (Ref: 3)                     | -         | 0.000     | 1.000    | -           | -           | -     |
| 4                                           | 21521.371 | 0.000     | 1.000    | 16.123      | 0.000       | -     |
| >5                                          | 19055.227 | 0.000     | 1.000    | 0.257       | 0.000       | -     |
| Constant                                    | 9473.577  | 0.000     | 0.998    | 1615474878  | -           | -     |
| N                                           | 350       |           |          |             |             |       |
| Nagelkerke ( <i>pseudo R</i> <sup>2</sup> ) | 0.826     |           |          |             |             |       |
| <b>Apam</b>                                 |           |           |          |             |             |       |
| Marital status                              | 8538.601  | 0.000     | 1.000    | 0.067       | 0.000       | -     |
| All year fishing                            | 0.831     | 10.834    | 0.001**  | 0.065       | 0.013       | 0.331 |
| House ownership                             | 1.011     | 0.085     | 0.770    | 0.744       | 0.103       | 5.402 |
| Canoe ownership                             | 0.890     | 16.932    | <0.001** | 0.026       | 0.004       | 0.147 |
| Age (Ref: <30)                              | -         | 15.106    | 0.002**  | -           | -           | -     |
| 30–40                                       | 7284.714  | 0.000     | 0.999    | 0.000       | 0.000       | -     |
| 41–50                                       | 7284.714  | 0.000     | 0.998    | 0.000       | 0.000       | -     |
| > 50                                        | 9835.067  | 0.000     | 0.997    | 0.000       | 0.000       | -     |
| Household size (Ref: 3)                     | -         | 1.964     | 0.375    | -           | -           | -     |
| 4                                           | 4194.735  | 0.000     | 0.997    | 0.000       | 0.000       | -     |
| >5                                          | 4194.735  | 0.000     | 0.997    | 0.000       | 0.000       | -     |
| Constant                                    | 6120.591  | 0.000     | 0.995    | 3.788E+16   | -           | -     |
| N                                           | 350       |           |          |             |             |       |
| Nagelkerke ( <i>pseudo R</i> <sup>2</sup> ) | 0.901     |           |          |             |             |       |
| <b>Gomoa Fetteh</b>                         |           |           |          |             |             |       |
| Marital status                              | 18.039    | 15293.961 | 0.000    | 0.999       | 68293477.03 | 0.000 |
| All year fishing                            | -         | -         | -        | -           | -           | -     |
| House ownership                             | -18.735   | 2505.844  | 0.000    | 0.994       | 0.000       | 0.000 |
| Canoe ownership                             | -1.857    | 0.824     | 5.080    | 0.024**     | 0.156       | 0.031 |
| Age (Ref: <30)                              | -         | -         | 0.000    | 1.000       | -           | -     |
| 30–40                                       | -18.658   | 7937.084  | 0.000    | 0.998       | 0.000       | 0.000 |
| 41–50                                       | 1.397     | 8853.411  | 0.000    | 1.000       | 4.042       | 0.000 |
| > 50                                        | 0.510     | 10238.197 | 0.000    | 1.000       | 1.665       | 0.000 |
| Household size (Ref: 3)                     | -         | -         | 12.791   | 0.002**     | -           | -     |
| 4                                           | 1.100     | 10726.299 | 0.000    | 1.000       | 3.005       | 0.000 |
| >5                                          | -1.859    | 10726.299 | 0.000    | 1.000       | 0.156       | 0.000 |
| Constant                                    | 21.203    | 7882.490  | 0.000    | 0.998       | 1615475040  | -     |
| N                                           | 350       |           |          |             |             |       |
| Nagelkerke ( <i>pseudo R</i> <sup>2</sup> ) | 0.756     |           |          |             |             |       |
| <b>Nyanyano</b>                             |           |           |          |             |             |       |
| Marital status                              | 14431.264 | 0.000     | 1.000    | 4.869       | 0.000       | -     |
| All year fishing                            | -         | -         | -        | -           | 0.000       | -     |
| House ownership                             | 2303.638  | 0.000     | 0.994    | 0.000       | 0.000       | -     |
| Canoe ownership                             | 2410.942  | 0.000     | 0.994    | 0.000       | 0.000       | -     |
| Age (Ref: <30)                              | -         | 0.000     | 1.000    | -           | -           | -     |
| 30–40                                       | 8823.663  | 0.000     | 1.000    | 0.106       | 0.000       | -     |
| 41–50                                       | 9782.753  | 0.000     | 1.000    | 1.068       | 0.000       | -     |
| > 50                                        | 12743.905 | 0.000     | 0.999    | 0.000       | 0.000       | -     |
| Household size (Ref: 3)                     | -         | 0.000     | 1.000    | -           | -           | -     |
| 4                                           | 10606.128 | 0.000     | 0.998    | 1.903E+13   | 0.000       | -     |

|                                             |           |           |          |            |            |        |
|---------------------------------------------|-----------|-----------|----------|------------|------------|--------|
| >5                                          | 10292.939 | 0.000     | 0.999    | 592777.750 | 0.000      | -      |
| Constant                                    | 7105.180  | 0.000     | 0.998    | 1615474829 | -          | -      |
| N                                           | 350       |           |          |            |            |        |
| Nagelkerke ( <i>pseudo R</i> <sup>2</sup> ) | 0.758     |           |          |            |            |        |
| <b>Bortianor</b>                            |           |           |          |            |            |        |
| Marital status                              | 0.000     | 16594.135 | 0.000    | 1.000      | 1.000      | -      |
| All year fishing                            | -         | -         | -        | -          | -          | -      |
| House ownership                             | -17.069   | 2169.764  | 0.000    | 0.994      | 0.000      | -      |
| Canoe ownership                             | -19.209   | 1891.450  | 0.000    | 0.992      | 0.000      | -      |
| Age (Ref: <30)                              | -         | -         | -        | 0.114      | -          | -      |
| 30-40                                       | 33.863    | 14772.778 | 5.943    | 0.998      | 5.088E+14  | -      |
| 41-50                                       | 32.764    | 14772.778 | 0.000    | 0.998      | 1.696e+14  | -      |
| > 50                                        | 31.704    | 14772.778 | 0.000    | 0.998      | 5.870E+13  | -      |
| Household size (Ref: 3)                     | -         | -         | 0.000    | 1.000      | -          | -      |
| 4                                           | 0.000     | 20096.502 | 0.000    | 1.000      | 1.000      | -      |
| >5                                          | -18.094   | 20294.929 | 0.000    | 0.999      | 0.000      | -      |
| Constant                                    | 21.203    | 8569.173  | 0.000    | 0.998      | 1615475178 | -      |
| N                                           | 350       |           |          |            |            |        |
| Nagelkerke ( <i>pseudo R</i> <sup>2</sup> ) | 0.795     |           |          |            |            |        |
| <b>James Town</b>                           |           |           |          |            |            |        |
| Marital status                              | 13054.680 | 0.000     | 0.997    | 7.535E+17  | 0.000      | -      |
| All year fishing                            | 0.794     | 3.202     | 0.074**  | 0.242      | 0.051      | 1.145  |
| House ownership                             | 0.843     | 4.158     | 0.041**  | 0.179      | 0.034      | 0.935  |
| Canoe ownership                             | 0.446     | 9.500     | 0.002**  | 0.253      | 0.105      | 0.606  |
| Age (Ref: <30)                              | -         | 9.408     | 0.024**  | -          | -          | -      |
| 30-40                                       | 9228.761  | 0.000     | 0.998    | 0.000      | -          | -      |
| 41-50                                       | 9228.761  | 0.000     | 0.998    | 0.000      | -          | -      |
| > 50                                        | 12348.339 | 0.000     | 1.000    | 0.468      | -          | -      |
| Household size (Ref: 3)                     | -         | 18.219    | <0.001** | -          | -          | -      |
| 4                                           | 9233.349  | 0.000     | 0.998    | 0.000      | -          | -      |
| >5                                          | 9233.349  | 0.000     | 0.998    | 0.000      | -          | -      |
| Constant                                    | 0.793     | 20.346    | <0.001** | 35.813     | -          | -      |
| N                                           | 350       |           |          |            |            |        |
| Nagelkerke ( <i>pseudo R</i> <sup>2</sup> ) | 0.389     |           |          |            |            |        |
| <b>Teshie</b>                               |           |           |          |            |            |        |
| Marital status                              | 15851.652 | 0.000     | 1.000    | 3.642      | 0.000      | -      |
| All year fishing                            | 4170.061  | 0.000     | 1.000    | 1.197      | 0.000      | -      |
| House ownership                             | 0.0684    | 6.069     | 0.014**  | 0.185      | 0.048      | 0.708  |
| Canoe ownership                             | 3015.977  | 0.000     | 0.995    | 0.000      | 0.000      | -      |
| Age (Ref: <30)                              | -         | 2.901     | 0.407    | -          | -          | -      |
| 30-40                                       | 10588.740 | 0.000     | 0.998    | 0.000      | 0.000      | -      |
| 41-50                                       | 10588.740 | 0.000     | 0.998    | 0.000      | 0.000      | -      |
| > 50                                        | 11761.949 | 0.000     | 1.000    | 0.786      | 0.000      | -      |
| Household size (Ref: 3)                     | -         | 5.101     | 0.078    | -          | -          | -      |
| 4                                           | 9227.744  | 0.000     | 1.000    | 1.132      | 0.000      | -      |
| >5                                          | 9227.744  | 0.000     | 1.000    | 0.176      | 0.000      | -      |
| Constant                                    | 7255.723  | 0.000     | 0.995    | 1.922E+18  | -          | -      |
| N                                           | 350       |           |          |            |            |        |
| Nagelkerke ( <i>pseudo R</i> <sup>2</sup> ) | 0.685     |           |          |            |            |        |
| <b>Adina</b>                                |           |           |          |            |            |        |
| Marital status                              | 17352.859 | 0.000     | 1.000    | 1.068      | 0.000      | -      |
| All year fishing                            | 20835.821 | 0.000     | 1.000    | 0.900      | 0.000      | -      |
| House ownership                             | 0.858     | 0.410     | 0.522    | 0.577      | 0.107      | 3.104  |
| Canoe ownership                             | 0.982     | 0.873     | 0.350    | 2.504      | 0.365      | 17.175 |
| Age (Ref: <30)                              | -         | 0.308     | 0.959    | -          | -          | -      |
| 30-40                                       | 18272.075 | 0.000     | 1.000    | 0.399      | 0.000      | -      |
| 41-50                                       | 16408.831 | 0.000     | 0.999    | 0.000      | 0.000      | -      |
| > 50                                        | 16408.831 | 0.000     | 0.999    | 0.000      | 0.000      | -      |
| Household size (Ref: 3)                     | -         | 0.000     | 1.000    | -          | -          | -      |
| 4                                           | 8933.348  | 0.000     | 1.000    | 0.000      | 0.000      | -      |

|                                             |          |       |       |            |
|---------------------------------------------|----------|-------|-------|------------|
| >5                                          | -        | -     | -     | -          |
| Constant                                    | 5645.527 | 0.000 | 0.997 | 1513323227 |
| N                                           | 350      |       |       |            |
| Nagelkerke ( <i>pseudo R</i> <sup>2</sup> ) | 0.233    |       |       |            |

---

**Note:** \*\*significant at 0.05. The communities of Azizanya, Dzita, Vodza, and Agavedzi could not be computed as the dependent variable appeared to be constant.
