# Supplementary material
Source: MDPI journal article supplement (https://www.mdpi.com/2073-4441/16/9/1201)
Supplement: s1 [file s1]

**Table S1.** Chi-square test of association between independent variables and livelihood opportunities of fishermen

| <b>Zonal analysis (all 15 communities combined)</b> |                                             |                                                                   |           |                |                   |
|-----------------------------------------------------|---------------------------------------------|-------------------------------------------------------------------|-----------|----------------|-------------------|
| <b>Variables</b>                                    |                                             | <b>Chi-Square (<math>X^2</math>) Tests and symmetric measures</b> |           |                |                   |
| <b>Independent</b>                                  | <b>Dependent</b>                            | <b><math>X^2</math></b>                                           | <b>df</b> | <b>P-value</b> | <b>Cramer's V</b> |
| Age                                                 | * House ownership                           | 300.861                                                           | 3         | <0.001**       | 0.239             |
|                                                     | * Canoe ownership                           | 83.448                                                            | 3         | <0.001**       | 0.126             |
|                                                     | * Income sufficiency                        | 80.885                                                            | 3         | <0.001**       | 0.124             |
| Marital status                                      | * House ownership                           | 65.560                                                            | 1         | <0.001**       | 0.112             |
|                                                     | * Income sufficiency                        | 20.470                                                            | 1         | <0.001**       | 0.062             |
| Level of education                                  | * Perceived climate change impact on health | 187.414                                                           | 2         | <0.001**       | 0.189             |
| Household size                                      | * Income sufficiency                        | 227.062                                                           | 2         | <0.001**       | 0.208             |
| Years of fishing                                    | * House ownership                           | 22.698                                                            | 2         | <0.001**       | 0.066             |
|                                                     | * Canoe ownership                           | 10.164                                                            | 2         | 0.006**        | 0.044             |
|                                                     | * Income sufficiency                        | 19.729                                                            | 2         | <0.001**       | 0.061             |
|                                                     | * Ease of securing loan from banks          | 35.491                                                            | 2         | <0.001**       | 0.082             |
| <b>Elmina Individual community analysis</b>         |                                             |                                                                   |           |                |                   |
| Age                                                 | * House ownership                           | —                                                                 | —         | —              | —                 |
|                                                     | * Canoe ownership                           | 21.253                                                            | 3         | <0.001**       | 0.246             |
|                                                     | * Income sufficiency                        | —                                                                 | —         | —              | —                 |
| <b>Fisher's Exact Test</b>                          |                                             |                                                                   |           |                |                   |
| Marital status                                      | * House ownership                           | -                                                                 | -         | 0.012**        | 0.125             |
|                                                     | * Income sufficiency                        | -                                                                 | -         | 0.021**        | 0.120             |
| Level of education                                  | * Perceived climate change impact on health | -                                                                 | -         | 1.000          | 0.002             |
| Household size                                      | * Income sufficiency                        | 31.942                                                            | 2         | <0.001**       | 0.302             |
| Years of fishing                                    | * House ownership                           | 12.016                                                            | 2         | 0.002**        | 0.185             |
|                                                     | * Canoe ownership                           | 6.078                                                             | 2         | 0.048**        | 0.132             |
|                                                     | * Income sufficiency                        | 12.483                                                            | 2         | <0.001**       | 0.189             |
|                                                     | * Ease of securing loan from banks          | 9.530                                                             | 2         | 0.009**        | 0.165             |
| <b>Cape Coast</b>                                   |                                             |                                                                   |           |                |                   |
| Age                                                 | * House ownership                           | —                                                                 | —         | —              | —                 |
|                                                     | * Canoe ownership                           | —                                                                 | —         | —              | —                 |
|                                                     | * Income sufficiency                        | —                                                                 | —         | —              | —                 |
| Marital status                                      | * House ownership                           | —                                                                 | —         | —              | —                 |
|                                                     | * Income sufficiency                        | —                                                                 | —         | —              | —                 |
| Level of education                                  | * Perceived climate change impact on health | —                                                                 | —         | —              | —                 |
| Household size                                      | * Income sufficiency                        | —                                                                 | —         | —              | —                 |
| Years of fishing                                    | * House ownership                           | —                                                                 | —         | —              | —                 |
|                                                     | * Canoe ownership                           | 25.927                                                            | 2         | <0.001**       | 0.272             |
|                                                     | * Income sufficiency                        | —                                                                 | —         | —              | —                 |
|                                                     | * Ease of securing loan from banks          | —                                                                 | —         | —              | —                 |
| <b>Moree</b>                                        |                                             |                                                                   |           |                |                   |
| Age                                                 | * House ownership                           | 25.531                                                            | 3         | <0.001**       | 0.270             |
|                                                     | * Canoe ownership                           | —                                                                 | —         | —              | —                 |
|                                                     | * Income sufficiency                        | —                                                                 | —         | —              | —                 |
| Marital status                                      | * House ownership                           | —                                                                 | —         | —              | —                 |
|                                                     | * Income sufficiency                        | —                                                                 | —         | —              | —                 |
| Level of education                                  | * Perceived climate change impact on health | 81.077                                                            | 2         | <0.001**       | 0.418             |

|                     |                                             |         |   |          |       |
|---------------------|---------------------------------------------|---------|---|----------|-------|
| Household size      | * Income sufficiency                        | —       | — | —        | —     |
| Years of fishing    | * House ownership                           | —       | — | —        | —     |
|                     | * Canoe ownership                           | —       | — | —        | —     |
|                     | * Income sufficiency                        | —       | — | —        | —     |
|                     | * Ease of securing loan from banks          | —       | — | —        | —     |
| <b>Biriwa</b>       |                                             |         |   |          |       |
| Age                 | * House ownership                           | —       | — | —        | —     |
|                     | * Canoe ownership                           | —       | — | —        | —     |
|                     | * Income sufficiency                        | —       | — | —        | —     |
| Marital status      | * House ownership                           | —       | — | —        | —     |
|                     | * Income sufficiency                        | —       | — | —        | —     |
| Level of education  | * Perceived climate change impact on health | 30.110  | 2 | <0.001** | 0.293 |
| Household size      | * Income sufficiency                        | —       | — | —        | —     |
| Years of fishing    | * House ownership                           | —       | — | —        | —     |
|                     | * Canoe ownership                           | —       | — | —        | —     |
|                     | * Income sufficiency                        | —       | — | —        | —     |
|                     | * Ease of securing loan from banks          | —       | — | —        | —     |
| <b>Apam</b>         |                                             |         |   |          |       |
| Age                 | * House ownership                           | 278.330 | 3 | <0.001** | 0.892 |
|                     | * Canoe ownership                           | 137.948 | 3 | <0.001** | 0.628 |
|                     | * Income sufficiency                        | 209.471 | 3 | <0.001** | 0.774 |
| Marital status      | * House ownership                           | 45.798  | 1 | <0.001** | 0.362 |
|                     | * Income sufficiency                        | 29.391  | 1 | <0.001** | 0.290 |
| Level of education  | * Perceived climate change impact on health | 10.687  | 2 | 0.005**  | 0.175 |
| Household size      | * Income sufficiency                        | 135.716 | 2 | <0.001** | 0.623 |
| Years of fishing    | * House ownership                           | 128.731 | 2 | <0.001** | 0.606 |
|                     | * Canoe ownership                           | 195.103 | 2 | <0.001** | 0.747 |
|                     | * Income sufficiency                        | 119.534 | 2 | <0.001** | 0.584 |
|                     | * Ease of securing loan from banks          | 137.304 | 2 | <0.001** | 0.626 |
| <b>Gomoa Fetteh</b> |                                             |         |   |          |       |
| Age                 | * House ownership                           | 12.601  | 3 | 0.006**  | 0.190 |
|                     | * Canoe ownership                           | —       | — | —        | —     |
|                     | * Income sufficiency                        | —       | — | —        | —     |
| Marital status      | * House ownership                           | 13.044  | 1 | <0.001** | 0.193 |
|                     | * Income sufficiency                        | —       | — | —        | —     |
| Level of education  | * Perceived climate change impact on health | 16.591  | 2 | <0.001** | 0.218 |
| Household size      | * Income sufficiency                        | —       | — | —        | —     |
| Years of fishing    | * House ownership                           | 14.517  | 2 | 0.001**  | 0.204 |
|                     | * Canoe ownership                           | —       | — | —        | —     |
|                     | * Income sufficiency                        | —       | — | —        | —     |
|                     | * Ease of securing loan from banks          | 8.614   | 2 | 0.013**  | 0.157 |
| <b>Nyanyano</b>     |                                             |         |   |          |       |
| Age                 | * House ownership                           | 24.752  | 3 | <0.001** | 0.266 |
|                     | * Canoe ownership                           | —       | — | —        | —     |
|                     | * Income sufficiency                        | —       | — | —        | —     |

|                    |                                             |        |   |          |       |
|--------------------|---------------------------------------------|--------|---|----------|-------|
| Marital status     | * House ownership                           | 14.286 | 1 | <0.001** | 0.202 |
|                    | * Income sufficiency                        | —      | — | —        | —     |
| Level of education | * Perceived climate change impact on health | —      | — | —        | —     |
| Household size     | * Income sufficiency                        | —      | — | —        | —     |
| Years of fishing   | * House ownership                           | 16.598 | 2 | <0.001** | 0.218 |
|                    | * Canoe ownership                           | —      | — | —        | —     |
|                    | * Income sufficiency                        | —      | — | —        | —     |
|                    | * Ease of securing loan from banks          | —      | — | —        | —     |
| <b>Bortianor</b>   |                                             |        |   |          |       |
| Age                | * House ownership                           | 41.053 | 3 | <0.001** | 0.342 |
|                    | * Canoe ownership                           | —      | — | —        | —     |
|                    | * Income sufficiency                        | —      | — | —        | —     |
| Marital status     | * House ownership                           | 12.562 | 1 | <0.001** | 0.189 |
|                    | * Income sufficiency                        | -      | - | 0.626    | 0.064 |
| Level of education | * Perceived climate change impact on health | —      | — | —        | —     |
| Household size     | * Income sufficiency                        | —      | — | —        | —     |
| Years of fishing   | * House ownership                           | —      | — | —        | —     |
|                    | * Canoe ownership                           | —      | — | —        | —     |
|                    | * Income sufficiency                        | —      | — | —        | —     |
|                    | * Ease of securing loan from banks          | —      | — | —        | —     |
| <b>James Town</b>  |                                             |        |   |          |       |
| Age                | * House ownership                           | —      | — | —        | —     |
|                    | * Canoe ownership                           | —      | — | —        | —     |
|                    | * Income sufficiency                        | —      | — | —        | —     |
| Marital status     | * House ownership                           | —      | — | —        | —     |
|                    | * Income sufficiency                        | 1.830  | 1 | 0.176    | 0.072 |
| Level of education | * Perceived climate change impact on health | —      | — | —        | —     |
| Household size     | * Income sufficiency                        | 6.898  | 2 | 0.032**  | 0.140 |
| Years of fishing   | * House ownership                           | —      | — | —        | —     |
|                    | * Canoe ownership                           | 7.012  | 2 | 0.030**  | 0.142 |
|                    | * Income sufficiency                        | 1.947  | 2 | 0.378    | 0.075 |
|                    | * Ease of securing loan from banks          | 14.901 | 2 | 0.001**  | 0.206 |
| <b>Teshie</b>      |                                             |        |   |          |       |
| Age                | * House ownership                           | 21.121 | 3 | <0.001** | 0.246 |
|                    | * Canoe ownership                           | 13.258 | 3 | 0.004**  | 0.195 |
|                    | * Income sufficiency                        | —      | — | —        | —     |
| Marital status     | * House ownership                           | 4.947  | 1 | 0.026**  | 0.119 |
|                    | * Income sufficiency                        | -      | - | 0.148    | 0.087 |
| Level of education | * Perceived climate change impact on health | 16.586 | 2 | <0.001** | 0.218 |
| Household size     | * Income sufficiency                        | —      | — | —        | —     |
| Years of fishing   | * House ownership                           | 10.861 | 2 | 0.004**  | 0.176 |
|                    | * Canoe ownership                           | 15.333 | 2 | <0.001** | 0.209 |
|                    | * Income sufficiency                        | —      | — | —        | —     |
|                    | * Ease of securing loan from banks          | 12.071 | 2 | 0.002**  | 0.186 |
| <b>Azizanya</b>    |                                             |        |   |          |       |

|                    |                                             |        |   |          |       |
|--------------------|---------------------------------------------|--------|---|----------|-------|
| Age                | * House ownership                           | —      | — | —        | —     |
|                    | * Canoe ownership                           | —      | — | —        | —     |
|                    | * Income sufficiency                        | —      | — | —        | —     |
| Marital status     | * House ownership                           | -      | - | 0.588    | 0.054 |
|                    | * Income sufficiency                        | —      | — | —        | —     |
| Level of education | * Perceived climate change impact on health | 22.474 | 1 | <0.001** | 0.253 |
| Household size     | * Income sufficiency                        | —      | — | —        | —     |
| Years of fishing   | * House ownership                           | 22.805 | 2 | <0.001** | 0.255 |
|                    | * Canoe ownership                           | 5.789  | 2 | 0.055    | 0.129 |
|                    | * Income sufficiency                        | —      | — | —        | —     |
|                    | * Ease of securing loan from banks          | —      | — | —        | —     |
| <b>Vodza</b>       |                                             |        |   |          |       |
| Age                | * House ownership                           | 21.981 | 3 | <0.001** | 0.251 |
|                    | * Canoe ownership                           | 9.316  | 3 | 0.025**  | 0.163 |
|                    | * Income sufficiency                        | —      | — | —        | —     |
| Marital status     | * House ownership                           | 0.087  | 1 | 0.768    | 0.016 |
|                    | * Income sufficiency                        | —      | — | —        | —     |
| Level of education | * Perceived climate change impact on health | —      | — | —        | —     |
| Household size     | * Income sufficiency                        | —      | — | —        | —     |
| Years of fishing   | * House ownership                           | 3.329  | 2 | 0.189    | 0.098 |
|                    | * Canoe ownership                           | 26.316 | 2 | <0.001** | 0.274 |
|                    | * Income sufficiency                        | —      | — | —        | —     |
|                    | * Ease of securing loan from banks          | —      | — | —        | —     |
| <b>Adina</b>       |                                             |        |   |          |       |
| Age                | * House ownership                           | —      | — | —        | —     |
|                    | * Canoe ownership                           | —      | — | —        | —     |
|                    | * Income sufficiency                        | —      | — | —        | —     |
| Marital status     | * House ownership                           | 0.563  | 1 | 0.453    | 0.040 |
|                    | * Income sufficiency                        | —      | — | —        | —     |
| Level of education | * Perceived climate change impact on health | —      | — | —        | —     |
| Household size     | * Income sufficiency                        | —      | — | —        | —     |
| Years of fishing   | * House ownership                           | 5.607  | 2 | 0.061    | 0.127 |
|                    | * Canoe ownership                           | 23.503 | 2 | <0.001** | 0.259 |
|                    | * Income sufficiency                        | —      | — | —        | —     |
|                    | * Ease of securing loan from banks          | 16.483 | 2 | <0.001** | 0.217 |

**Note:** \*\*significant at 0.05, —could not be used in the analysis as 1 or more cells had an expected count less than 5 or the variable appeared to be constant, —statistics were computed using the Fisher's Exact Tests. No statistics were computed for the communities of Dzita and Agavedzi as 1 or more cells had an expected count less than 5 or the variables appeared to be constant for all the analysis.
